# Supplementary material for: Expression of the Protein Phosphatase Gene SlPP2C28 Confers Enhanced Tolerance to Bacterial Wilt in Tobacco
Source: MDPI journal article supplement (doi:10.3390/horticulturae11080937), 2025-08-08
Supplement: s1 [file Supplementary Figures.pdf › Supplementary Figures.pdf]

## Supporting Information Figures legends

**Figure S1 *SIPP2C28* sequence in the pVCT2470-*SIPP2C28* vector.**

> *SIPP2C28* in pVCT2470 (1221 bp)

```
atgtcttttggcgagactagaactatagctccaaccgaaccgagtagcgaagctgcaagaaggagacgcatggaaattcatcagtttcgattg
ttgccagcgatatggcgggtggctccaccgagtagtatggagaatggaaggaagagaaagaaattggagaaaaactgtgtccgtaaaaagctat
gatagtaaagagaagaagaattcaagttggaaagaattgttccctcccactttcgtgctgctgactgatgtgggtgaaaagaagctagcag
agaataaagaaaaccgaacgaacgctttggatttgacgggaatctgcatctgtatcgtcgaatattgagcgcaggaggagctccgactgtccga
aattcgggatgacatctgtatgtggaaggagaagagatatggaagatacgggtgtcgtatctaccgtcgtttctcaggataaacatgaaaagtc
cagcatcttacatttctcgggtctctacgacggccacggctgctctcatgcgcgcatgaaatgtaaagatagaatgcatgagatagtgagaac
gaggttgagagcgcaggagaagctacatggaagagatgatgattcagagcttctcaaaaatggacaaagaagtagttgaatattcgaaagg
agctggaggtagacaaaactcgggatttagatggaacttcagacgccgcagtgcgatgccgttggatccactgctgtcgtggccgctctaac
tccaaacaaaatcgtcgtgtccaactcggcgattctcgcgtgtgctctgcagaaacgggtgcccaattcctctgtccactgaccataagcctg
atcgaccgatgaactcaatcgattgaagaagctggcggctcgtgtaactattgggatgggtgcgagagtcttgagatttggctatgtctcga
gcaatcgggtgacagtacttgaaaccgtatgttacatctgaaccggaggtgaccataacggagagaacagtggaagacgagtggttgatatta
gctagcgacgggctatgggatgtgtgtcaaacgagacagcatgtggtgtggctcgcgtgtgctgcatctgggcagaactctgaccaggct
tgactgatgcatcaatcctcttgacaaggctggcttggctcggcacagttcggataatgtagcgttgcgtgtgtgattgaaaagaggtctat
ag//
```

The deduced amino acid sequence: (406 aa, 44.68 kDa)

```
MSFGETRTIAPTEPSTEAARRRRMEIHQFRFVASDMAVAPPSSMENGRKRKKLEKTVSVKS
YDSKEKKQFKLERIVSLPLSLPCTDVGEKKLAENKETETNALDLTESASVSSNIERQGVSD
CPKFGMTSVCGRRRDMEDTVSIYPSFLQDKHEKSSILHFFGLYDGHGCSHAAMKCKDRM
HEIVKNEVESAGEATWKEMMIQSFSKMDKEVVEYSKGAGGTQTADCRCELQTPQCDV
GSTAVVAVLTPNKIVVSNCGDSRAVLCRNGVPIPLSTDHKPDRPDELNRIEEAGGRVIYWD
GARVLGVLAMSRAIGDSYLKPYVTSEPEVTITERTVEDECLILASDGLWDVVSNETACGVA
RMCLRSGQNSDQACTDASILLTRLALARHSSDNVSVVVVDLKRGL
```

**Figure S2 Structural diagram of the tobacco overexpression vector pVCT2470-*SIPP2C28*.**

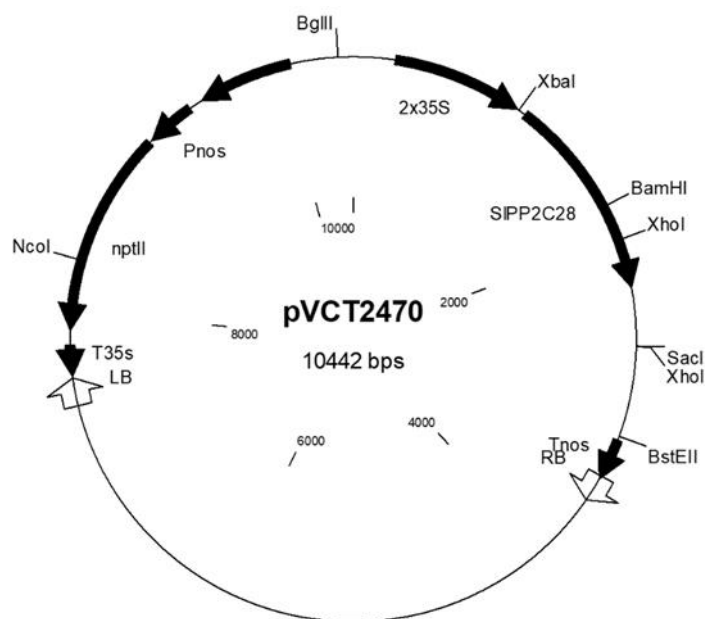

**Figure S3 Effect of *SIPP2C28* silencing on the resistance of tomato to bacterial wilt.**

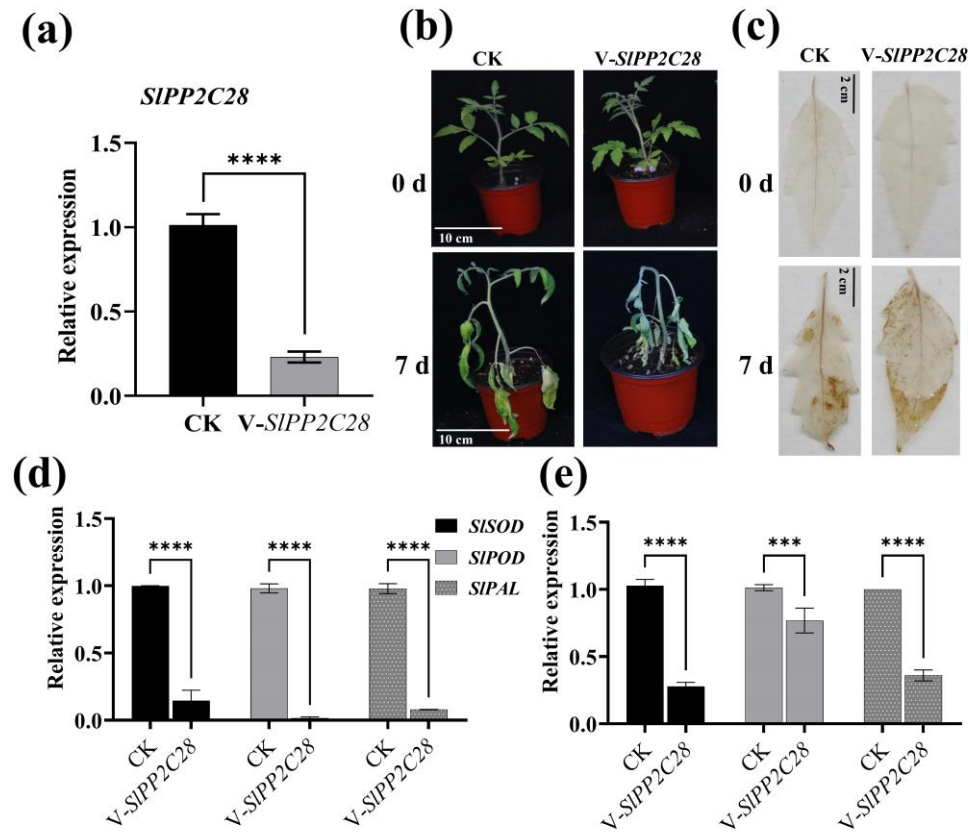

(a) Efficiency of *SIPP2C28* gene silencing by virus-induced gene silencing (VIGS). CK represents the Non-silenced tomato plants; V-*SIPP2C28* represents the *SIPP2C28*-silenced tomato plant. The results are expressed as the mean  $\pm$  standard deviation, and statistical analysis was performed using t-test;  $\alpha = 0.05$ , \*\*\*\* $P < 0.0001$ . (b) Phenotypes of Non-silenced and *SIPP2C28*-silenced tomato plants seven days after inoculation with *R. solanacearum*. 0 d: before treatment; 7 d: treatment of seven days. Scale bars= 10 cm. (c) DAB staining of tomato leaves. Scale bars= 2 cm. (d) Relative expression levels of defense enzyme-related genes. (e) Relative expression levels of pathogenesis-related genes. The results are expressed as the mean  $\pm$  standard deviation, and statistical analysis was performed using two-way ANOVA;  $\alpha = 0.05$ , \*\*\* $P < 0.001$ , \*\*\*\* $P < 0.0001$ . The experimental parts of a, d–e used 3 biological replicates and repeated three times, the experimental parts of b–c used 3 biological replicates.
