# Supplementary material for: Expression of the Protein Phosphatase Gene SlPP2C28 Confers Enhanced Tolerance to Bacterial Wilt in Tobacco
Source: MDPI journal article supplement (doi:10.3390/horticulturae11080937), 2025-08-08
Supplement: s1 [file Supplementary Table.pdf › Supplementary Table.pdf]

**Supplementary Table S1** Primers used in this study.

| Primer description                                                                          | F-primer                                         | R-primer                                         |
|---------------------------------------------------------------------------------------------|--------------------------------------------------|--------------------------------------------------|
| PCR primers of V- <i>SlPP2C28</i> vector                                                    | AGAAGGCCTCCATGGGGATCCTGTCTTTTGGCG<br>AGACTAGAACT | GGGACATGCCCGGGCCTCGAGCGTTTCGGTTT<br>CTTTATTCTCTG |
| First nest PCR primers of <i>SlPP2C28</i> in AC-cDNA                                        | CGGTAGTTTTAGCGATTGATTG                           | CACGAGCTCCATCACAAACAATAGCGAATG                   |
| Second nest PCR primers of <i>SlPP2C28</i> in AC-cDNA                                       | GCTCTAGAAGAAGAGTGAGTGTA                          | CACGAGCTCCATCACAAACAATAGCGAATG                   |
| Detection of the target gene <i>SlPP2C28</i> in the <i>Escherichia coli</i> vector          | CACAGTTCGGATAATGTTAGCG                           | CGTTCGATGACGAAAATGGAAG                           |
| Detection of the target gene <i>SlPP2C28</i> in the <i>Agrobacterium tumefaciens</i> vector | CACAGTTCGGATAATGTTAGCG                           | CGTTCGATGACGAAAATGGAAG                           |
| Real-Time PCR primers of <i>SlPP2C28</i> in tobacco                                         | CACAGTTCGGATAATGTTAGCG                           | ATGTCCAGAACACCAACTTAGT                           |
| Real-Time PCR primers of <i>NbSOD</i>                                                       | CTATAGTCGGTGCGCCTGAATG                           | GGACCATCATCATCTTGGGATAG                          |
| Real-Time PCR primers of <i>NbPOD</i>                                                       | CCCTTTGAAACCCTTGCTGTAATG                         | GCACATCTTGCTCTTCCAAATG                           |
| Real-Time PCR primers of <i>NbPAL</i>                                                       | GCCTTCTAATTTAACCGGAGGACG                         | GAATAGGAGCTCAGAGCAATAGG                          |
| Real-Time PCR primers of <i>NbPR1a</i>                                                      | GGACACTATACTCAGGTGGTTTG                          | CTGGAGGATCATAGTTGCAAGAG                          |
| Real-Time PCR primers of <i>NbPR2</i>                                                       | GGAAATGAAGTCTCTCCACAAAT                          | TTCGCTAAGAGCCCTGAATATG                           |
| Real-Time PCR primers of <i>NbPR4</i>                                                       | AGTGCTTTCTGCGCTACTTGGGAT                         | CAAGCATCTACCACAGGAATCT                           |
| Real-Time PCR primers of <i>NbPR10</i>                                                      | CTCATGACCACCAATGGACTAC                           | TGAGAAGGTGACTCTCTACATCT                          |
| Real-Time PCR primers of actin gene <i>βactin</i> in tobacco                                | GCACCACCAGAGAGGAAATATAG                          | GAAGGACCTGATTTCGTCATACTC                         |
| Real-Time PCR primers of <i>SlPP2C28</i> in tomato                                          | CACAGTTCGGATAATGTTAGCG                           | ATGTCCAGAACACCAACTTAGT                           |
| Real-Time PCR primers of <i>SlSOD</i> in tomato                                             | ACTATTACCGACAAGCAGATTCC                          | CCTCCCTTTCCAAGATCATCAG                           |
| Real-Time PCR primers of <i>SlPOD</i> in tomato                                             | GTGTCAGAAGCCAATGGTGATAT                          | GGACCAGGTCATTTCAGATCAAG                          |
| Real-Time PCR primers of <i>SlPAL</i> in tomato                                             | AGATTGGCCCTTGCATCTATTGG                          | CAGCTCCCTTGAGTCCATAATC                           |

|                                                               |                         |                        |
|---------------------------------------------------------------|-------------------------|------------------------|
| Real-Time PCR primers of <i>SlPR5</i> in tomato               | TCTCGAGAGAGGTCAGAGTTG   | TGCAATCCAGGACTCCACCAC  |
| Real-Time PCR primers of <i>SlPR10</i> in tomato              | GCTGCTGGAGATGGAGGTTGTG  | GAGGTACGCTTCGATGGCCTTG |
| Real-Time PCR primers of <i>SlPR-NP24</i> in tomato           | CACAAGACGATCCTACAAGCAC  | CATCAGTACTTGCAGGCATCTC |
| Real-Time PCR primers of actin gene <i>SlActin7</i> in tomato | GGTCGGAATGGGACAGAAGGATG | CCTCAGTCAGGAGAACAGGGTG |

---
